# Supplementary material for: Effects of grassland duration on butterfly communities and its relevance to grassland area
Source: Research Square preprint supplement (doi:10.21203/rs.3.rs-4056425/v1), 2024-03-13
Supplement: Supplementary file 1 [file 60bd4019644136b15b2fdd1e.xlsx]

## Sheet: Supplementary table 1
Supplemantary Table 1. Information on the study sites. Old and entire area represented the grassland areas within each radius r.
No.	site	Slope	longitude	latitude	Type	Vegetation height (cm)	Elevation(m)	Old_area <50	Old_area <100	Old_area <200	Old_area <300	Old_area <400	Old_area <500	Old_area <600	Old_area <700	Old_area <800	Old_area <900	Old_area <1000	Entire_area <50	Entire_area <100	Entire_area <200	Entire_area <300	Entire_area <400	Entire_area <500	Entire_area <600	Entire_area <700	Entire_area <800	Entire_area <900	Entire_area <1000
1	Sugadaira research center	5	138.349	36.5238	Old	92.7	1329	4633	15036	38903	40184	40184	40184	40184	40184	40184	40184	40184	7725	20926	46059	47340	47340	47340	47340	47340	47340	47340	47340
2	Oku-davos forest	10	138.357	36.5457	Forest	89.2	1360.9	2821	13875	43210	102262	163380	231357	299257	362777	428457	506976	608814	3851	19709	52839	127446	220312	295990	366276	430859	500286	590046	698536
3	Oku-davos grassland	8	138.357	36.5451	Old	66.8	1378.1	7256	22425	69065	116561	164847	234113	303633	370571	444957	529256	632767	7256	25322	78416	142947	213290	295517	371114	439825	523506	615864	723785
4	Tengu Forest	20	138.336	36.5334	Forest	100.3	1359.6	0	0	0	2993	9185	9185	15125	27946	34701	77629	141760	2966	18373	69294	109661	149821	204186	257185	326925	425944	516266	582113
5	Tengu grassland	20	138.336	36.5336	New	68.6	1352.6	0	0	0	220	7449	9185	14013	25329	51016	114095	167625	7321	24208	60993	101464	142498	194782	260492	339731	454000	554448	607978
6	Hinode grassland	23	138.334	36.5331	New	73.4	1344.8	0	0	3591	9185	9185	9203	19899	26634	30441	35759	76276	6862	17709	63878	125078	171386	204218	251892	327157	383905	444025	514957
7	Minenohara B grassland	17	138.356	36.557	Old	96.4	1472.7	5957	17104	45329	87255	133051	151704	160241	166222	171020	182581	228207	7185	23910	86003	140442	194120	221915	239575	250550	258396	283293	340947
8	Minenohara C grassland	17	138.353	36.5561	Old	78.8	1412.7	7727	26121	59231	116047	150445	160301	166036	169214	171936	177037	197638	7727	26128	65432	127058	193025	219302	232119	247933	260042	278154	310467
9	Minenohara forest	20	138.353	36.5572	Forest	24.7	1433.6	1254	17081	89376	132232	158707	164349	169278	171853	175621	175914	179686	1254	17277	100395	166017	217548	232082	250423	260271	266049	266342	283289
10	Omatsu east grassland	22	138.316	36.5118	New	87.3	1463.7	0	0	0	0	0	0	0	0	0	0	0	7695	21584	44004	62950	80189	101366	132477	177275	217435	275594	313659
11	Omatsu forest	26	138.308	36.5139	Forest	132.5	1522.1	0	0	0	0	0	0	0	0	0	0	0	1847	14461	71368	136154	185296	237177	263923	291601	318953	323098	323456
12	Omatsu west grassland	28	138.308	36.5145	New	112.1	1514.8	0	0	0	0	0	0	0	0	0	0	0	7014	20649	77351	140610	188223	232890	258277	267536	304193	320733	323452
13	Tsubakuro grassland	31	138.304	36.5271	New	117.5	1426.4	0	0	0	0	221	1061	1061	1061	1061	1061	1061	5728	19419	53405	81488	100081	105181	105181	105181	105181	105181	105181
14	Omotetaro grassland	26	138.332	36.5324	Old	104.3	1319.2	3952	8759	9185	9185	9185	11786	21530	23139	25824	28960	30786	6826	20215	62599	100407	135780	182169	236108	292195	337982	370119	402536
15	Shirokane forest	12	138.33	36.5356	Forest	88.6	1327.2	435	3934	12345	12671	18170	22085	23820	26536	29279	30786	30786	610	8392	40495	71612	109302	183513	251346	319595	375071	399540	407003
16	Shirokane grassland	14	138.329	36.5363	Old	107.5	1324.5	4654	9465	12345	12900	12900	19638	24036	26801	29491	30786	30786	7702	22754	56025	71948	91195	155926	230404	298682	371513	403573	407003
17	Ura-davos grassland	9	138.343	36.5383	Old	37.1	1378.1	5934	16284	61448	105584	159196	213005	259314	293470	328286	353255	373874	5934	16284	61608	109647	172428	265509	367022	458868	589855	665053	718829
18	Ura-taro forest	16	138.338	36.5371	Forest	33.1	1354.2	0	0	0	7608	13735	35784	57228	109441	178536	228949	268215	2123	14279	39448	84002	182608	262054	330152	421748	552187	660550	709424
19	Ura-taro-grassland	16	138.337	36.538	New	99	1339.6	0	0	6872	8701	18123	36737	56615	90499	156335	215806	257134	7441	21696	53033	119150	195836	248599	305013	380433	491228	628037	697487

## Sheet: Supplementary Table 2
Supplementary Table 2.Table of butterflies detected in this survey. The total number of individuals per survey site was entered. The Red List column indicates 1 for Near Threatened, 2 for Vulnerable, 3 for Critically Endangered or Endangered, and 4 for Extinct. For the purposes of this paper, rare species were defined as those that are Near-Threatened or greater on the Redlist of Japan or each (G…
No.	Species	Sugadaira research center	Tsubakuro grassland	Oku-davos forest	Oku-davos grassland	Omatsu west grassland	Omatsu forest	Omatsu east grassland	Tengu Forest	Tengu grassland	Hinode grassland	Shirokane forest	Shirokane grassland	Omotetaro grassland	Minenohara B grassland	Minenohara C grassland	Minenohara forest	Ura-davos grassland	Ura-taro forest	Ura-taro grassland	Redlist Japan	Redlist Gunma Pref.	Redlist Saitama Pref.	Redlist Nigata Pref.	Redlist Toyama Pref.	Redlist Yamanashi Pref.	Redlist Ngano Pref.	Redlist Gifu Pref.	Redlist Aichi Pref.	Grassland species	Voltinism	Winterring
1	Hesperia florinda florinda	0	0	0	1	0	0	1	0	1	5	0	2	0	1	1	0	3	0	0	3	2	4	NA	NA	3	1	3	NA	1	1	Egg
2	Vanessa indica indica	0	0	0	1	1	0	0	0	0	0	0	0	0	1	0	0	0	0	0	NA	NA	NA	NA	NA	NA	NA	NA	NA	0	2	Adult
3	Parantica sita niphonica	0	0	0	0	0	1	0	0	0	0	0	0	0	1	0	0	0	0	0	NA	NA	NA	NA	NA	NA	NA	NA	NA	0	ｎ	Larva
4	Parnara guttata guttata	2	3	0	2	4	0	37	0	1	10	0	2	13	6	1	0	7	0	0	NA	NA	NA	NA	NA	NA	NA	NA	NA	0	3	Larva
5	Curetis acuta paracuta	1	0	0	0	0	0	0	0	0	0	0	0	0	1	2	0	0	0	0	NA	NA	NA	NA	NA	NA	NA	NA	NA	0	2	Adult
6	Argyronome laodice japonica	0	1	0	0	4	0	0	0	1	1	0	0	0	1	3	0	0	0	0	2	1	1	NA	NA	1	1	1	1	1	1	Egg, Larva
7	Fabriciana adippe pallescens	8	12	0	1	30	0	7	0	10	23	0	20	9	22	8	0	7	0	1	NA	NA	1	NA	NA	NA	NA	NA	NA	1	1	Egg, Larva
8	Nymphalis vaualbum	0	2	0	0	1	0	0	0	0	0	0	0	0	0	0	0	0	0	0	NA	NA	NA	1	NA	NA	NA	NA	NA	0	1	Adult
9	Argyronome ruslana	1	0	0	0	0	0	0	0	0	1	0	0	0	0	0	0	0	0	0	NA	NA	NA	NA	NA	NA	NA	NA	1	0	1	Egg, Larva
10	Papilio dehaanii	1	1	0	0	1	2	1	0	0	0	0	0	0	0	0	0	1	0	0	NA	NA	NA	NA	NA	NA	NA	NA	NA	0	2	Pupa
11	Papilio machaon hippocrates	0	0	0	0	8	0	2	0	4	0	0	0	0	1	1	0	5	0	0	NA	NA	NA	NA	NA	NA	NA	NA	NA	1	2	Pupa
12	Eurema mandarina mandarina	0	0	0	1	0	0	0	0	0	1	0	0	2	1	0	0	2	0	0	NA	NA	NA	NA	NA	NA	NA	NA	NA	0	3	Adult
13	Speyeria aglaja	1	4	0	0	5	0	11	0	0	0	0	4	0	0	0	0	0	0	0	NA	NA	NA	NA	NA	NA	NA	NA	NA	1	1	Larva
14	Inachis io geisha	0	0	0	0	0	0	0	0	0	0	0	1	0	0	0	0	0	0	0	NA	NA	NA	NA	NA	NA	NA	NA	NA	0	2	Adult
15	Lethe diana	0	1	16	0	0	10	0	6	0	0	4	0	0	0	0	5	0	3	0	NA	NA	NA	NA	NA	NA	NA	NA	NA	0	2	Larva
16	Ochlodes venatus venatus	0	2	0	2	0	0	2	0	6	3	0	2	2	2	2	0	0	0	1	NA	NA	1	NA	NA	NA	NA	NA	2	0	1	Larva
17	Thoressa varia	0	1	0	0	0	0	0	0	2	2	0	0	2	1	0	0	0	0	0	NA	NA	NA	NA	NA	NA	NA	NA	NA	0	1	Larva
18	Melitaea ambigua niphona	0	0	0	0	0	0	0	0	0	0	0	0	0	7	5	0	0	0	0	3	2	4	3	3	3	2	1	NA	1	1	Larva
19	Neptis sappho	1	0	0	0	0	0	1	1	0	0	0	0	0	0	0	0	0	0	0	NA	NA	NA	NA	NA	NA	NA	NA	NA	0	2	Larva
20	Polygonia c-album hamigera	0	0	0	0	1	0	0	0	0	0	0	0	0	0	0	0	0	0	0	NA	NA	NA	NA	NA	NA	NA	NA	NA	0	2	Adult
21	Minois dryas bipunctata	0	0	0	26	0	0	0	0	2	0	0	0	4	9	4	3	20	0	1	NA	NA	1	NA	NA	NA	NA	NA	NA	1	1	Larva
22	Pieris melete	0	4	0	0	0	1	1	2	1	0	3	4	2	1	4	1	0	1	0	NA	NA	NA	NA	NA	NA	NA	NA	NA	0	3	Pupa
23	Gonepteryx aspasia niphonica	0	2	0	0	3	0	0	0	0	0	0	0	0	0	0	0	0	0	0	NA	NA	1	NA	NA	NA	NA	NA	3	0	1	Adult
24	Everes argiades argiades	1	0	0	1	0	0	3	0	1	3	0	0	1	0	0	0	0	0	0	NA	NA	NA	NA	NA	NA	NA	NA	NA	1	2	Larva
25	Argyreus hyperbius hyperbius	0	0	0	0	1	0	1	0	0	0	0	0	0	0	0	0	1	0	0	NA	NA	NA	NA	NA	NA	NA	NA	NA	1	4	Larva
26	Rapala arata	0	0	0	1	0	0	1	0	0	0	0	0	2	0	0	0	0	0	0	NA	NA	NA	NA	NA	NA	NA	NA	NA	0	1	Pupa
27	Nymphalis xanthomelas japonica	0	1	0	0	0	0	0	0	0	0	0	0	0	0	0	0	0	0	0	NA	NA	2	NA	NA	NA	NA	NA	NA	0	1	Adult
28	Zophoessa callipteris	0	0	0	0	0	19	0	1	0	0	1	0	0	0	1	0	0	0	0	NA	NA	NA	NA	NA	NA	NA	NA	NA	0	1	Larva
29	Plebejus argus	31	0	0	17	0	0	0	0	0	11	0	0	0	0	0	0	0	0	0	NA	NA	NA	NA	NA	NA	NA	NA	NA	1	1	Egg
30	Brenthis daphne	2	7	0	13	0	0	0	0	4	5	0	2	3	8	9	0	3	0	0	2	1	4	3	NA	2	1	4	NA	1	1	Larva
31	Lycaena phlaeas chinensis	0	0	0	0	0	0	0	0	0	0	0	0	0	3	1	0	0	0	0	NA	NA	NA	NA	NA	NA	NA	NA	NA	1	3	Larva
32	Thymelicus sylvaticus	0	0	0	0	0	0	0	0	2	1	0	0	0	0	0	0	0	0	0	NA	NA	1	1	1	2	1	1	3	1	1	NA
33	Argynnis paphia tsushimana	32	38	0	7	38	6	11	1	14	14	14	17	4	12	2	2	12	13	5	NA	NA	NA	NA	NA	NA	NA	NA	NA	0	1	Egg, Larva
34	Damora sagana liane	1	3	0	0	2	0	5	0	0	2	0	1	2	0	0	0	0	0	0	NA	NA	1	NA	NA	NA	NA	NA	NA	0	1	Egg, Larva
35	Colias erate poliographa	3	0	0	2	5	0	4	0	1	33	0	4	7	4	6	0	6	0	3	NA	NA	NA	NA	NA	NA	NA	NA	NA	1	3	Larva
36	Pieris rapae crucivora	0	0	0	0	0	0	0	0	0	0	0	0	0	0	0	0	0	0	1	NA	NA	NA	NA	NA	NA	NA	NA	NA	0	3	Pupa
37	Neope niphonica	0	0	1	0	0	0	0	1	0	0	1	0	0	0	0	2	0	0	0	NA	NA	NA	NA	NA	NA	NA	NA	NA	0	2	Pupa
38	Celastrina argiolus ladonides	0	1	0	4	1	0	1	0	2	0	0	1	0	1	3	0	0	0	0	NA	NA	NA	NA	NA	NA	NA	NA	NA	0	3	Pupa
39	Kaniska canace	0	0	0	0	0	0	0	0	0	0	0	0	0	0	0	1	0	0	0	NA	NA	NA	NA	NA	NA	NA	NA	NA	0	2	Adult

## Sheet: Supplementary Table 3
Supplementary Table 3. Plant distribution table from a vegetation survey (Inoue et al. 2021) conducted in the same study sites as this paper.
No.	Species	Sugadaira research center	Tsubakuro grassland	Oku-davos forest	Oku-davos grassland	Omatsu west grassland	Omatsu forest	Omatsu east grassland	Tengu Forest	Tengu grassland	Hinode grassland	Shirokane forest	Shirokane grassland	Omotetaro grassland	Minenohara B grassland	Minenohara C grassland	Minenohara forest	Ura-davos forest	Ura-davos grassland	Ura-taro forest	Ura-taro grassland
1	Abies firma	0	0	0	0	0	0	0	0	0	0	0	0	0	0	0	0	0	0	1	0
2	Acer ginnala	0	0	0	0	0	0	0	0	0	1	0	0	0	0	0	0	0	0	0	0
3	Acer japonicum	0	0	0	0	0	0	0	0	0	0	0	0	0	0	0	1	0	0	0	0
4	Acer pictum	0	0	0	0	0	0	0	0	0	0	0	0	0	0	0	0	0	0	1	0
5	Acer rufinerve	0	0	0	0	0	0	0	0	0	0	0	0	0	0	0	1	0	0	1	0
6	Aconitum chinense	0	1	0	0	0	0	0	0	0	0	0	0	0	0	0	0	0	0	0	0
7	Actinidia arguta	0	0	0	0	0	0	0	0	0	0	1	0	0	0	0	0	0	0	1	0
8	Adenophora triphylla	1	0	0	1	0	0	0	0	0	0	0	1	1	1	1	0	0	1	0	0
9	Agastache rugosa	0	1	0	0	0	0	0	0	0	0	0	0	0	0	0	0	0	0	0	0
10	Akebia trifoliata	0	0	0	0	0	0	0	0	0	0	0	0	0	0	0	0	0	0	1	0
11	Aletris foliata	0	0	0	1	0	0	0	0	0	0	0	0	0	0	0	0	0	0	0	0
12	Allium thunbergii	1	0	0	0	0	0	0	0	0	0	0	0	0	0	0	0	0	0	0	0
13	Ambrosia trifida	1	0	0	0	0	0	0	0	0	1	0	0	0	0	0	0	0	0	0	0
14	Ampelopsis glandulosa	0	0	0	0	0	0	0	0	0	0	1	0	0	0	0	0	0	0	0	0
15	Amphicarpaea bracteata	1	0	0	0	0	0	1	0	0	1	0	1	0	0	0	0	0	0	0	1
16	Anaphalis margaritacea	0	0	0	0	0	0	1	0	0	0	0	0	0	0	0	0	0	0	0	0
17	Angelica pubescens	1	1	0	0	1	0	1	0	1	0	0	1	1	0	1	0	0	1	0	0
18	Anthoxanthum odoratum	0	0	0	0	0	0	0	0	0	0	0	0	0	1	1	0	0	0	0	0
19	Aquilegia buergeriana	0	0	0	0	0	0	0	0	0	0	0	0	0	0	1	0	0	0	0	0
20	Aralia cordata	0	1	0	0	0	0	1	0	0	0	0	0	0	0	0	0	0	0	0	0
21	Arenaria lateriflora	1	0	0	1	1	0	1	0	1	0	0	1	0	1	1	0	0	1	1	1
22	Aria alnifolia	0	0	1	0	0	0	0	0	0	0	0	0	0	0	0	0	0	0	0	0
23	Arisaema japonicum	0	0	0	0	0	0	0	0	0	0	1	0	0	0	0	0	0	0	1	0
24	Arisaema sp.	0	0	0	0	0	1	0	0	0	0	0	0	0	0	0	0	0	0	0	0
25	Artemisia indica	1	1	0	1	1	0	0	0	1	1	0	1	1	1	1	0	0	1	0	1
26	Artemisia japonica	1	0	0	0	0	0	0	0	1	0	0	0	0	0	0	0	0	1	0	0
27	Arundinella hirta	0	0	0	1	0	0	0	0	1	0	0	1	1	0	0	0	0	0	0	0
28	Asplenium incisum	0	0	0	0	0	0	0	0	0	0	0	0	0	0	0	0	0	0	1	0
29	Aster glehnii	0	0	0	0	0	0	0	0	0	0	0	0	0	1	0	0	0	0	0	0
30	Aster iinumae	0	0	0	0	0	0	0	0	0	1	0	0	0	0	0	0	0	0	0	0
31	Aster microcephalus	1	0	0	0	0	0	0	0	1	0	0	1	1	0	1	0	0	0	0	0
32	Astilbe microphylla	0	0	0	0	0	0	0	0	0	0	0	0	0	0	0	0	0	0	1	0
33	Astilbe thunbergii	0	0	0	0	1	0	0	0	0	0	0	0	0	1	0	0	0	0	0	0
34	Berberis thunbergii	0	0	0	0	0	0	0	0	0	0	1	0	0	0	0	0	0	0	0	0
35	Betula platyphylla	0	0	1	1	0	0	1	1	0	0	0	0	0	0	0	0	1	0	0	0
36	Boehmeria silvestrii	0	0	0	0	1	0	0	0	0	0	0	0	0	0	0	0	0	0	0	0
37	Botrychium ternatum	0	0	0	0	0	0	1	0	0	0	0	0	0	1	1	0	1	1	1	0
38	Bupleurum longiradiatum	0	0	0	0	1	0	0	0	0	0	0	0	0	0	0	0	0	0	0	0
39	Calamagrostis sp.	0	1	0	0	0	0	0	0	0	0	0	0	0	0	0	0	0	0	0	0
40	Callicarpa japonica	0	0	0	0	0	0	0	0	0	0	0	0	0	0	0	0	0	0	1	0
41	Campanula punctata	1	0	0	1	0	0	0	0	0	0	0	0	0	0	1	0	0	0	0	0
42	Capillipedium parviflorum	1	0	0	0	0	0	0	0	0	0	0	0	0	0	0	0	0	0	0	0
43	Cardamine leucantha	0	0	0	0	0	0	0	0	0	0	0	0	0	0	0	0	0	0	1	0
44	Cardiocrinum cordatum	0	1	0	0	0	0	0	0	0	0	0	0	0	0	0	0	0	0	0	0
45	Carex caryophyllea	0	0	0	0	0	0	0	0	1	0	0	0	0	0	0	0	0	0	0	0
46	Carex grallatoria	0	0	0	0	0	0	0	0	1	0	0	0	0	0	0	0	0	0	0	0
47	Carex lanceolata	1	0	0	0	0	0	1	0	1	0	0	1	1	0	1	1	0	1	1	0
48	Carex leucochlora	1	0	0	0	0	0	0	0	0	0	0	1	0	0	0	0	0	0	0	0
49	Carex nervata	0	0	0	1	0	0	0	0	1	0	0	1	1	1	1	0	0	1	0	0
50	Carex nubigena	0	1	0	0	0	0	0	0	0	0	0	0	0	0	0	0	0	0	0	0
51	Carex oxyandra	0	0	0	0	0	0	0	0	1	0	0	0	1	0	0	0	0	0	0	0
52	Carex sachalinensis	0	0	0	0	0	0	0	0	0	1	0	0	0	0	0	0	0	0	0	0
53	Carex stenostachys	0	1	0	0	1	0	0	0	0	0	0	0	0	0	0	0	0	0	0	0
54	Carthamus tinctorius	0	1	0	0	0	0	0	0	0	0	0	0	0	0	0	0	0	0	0	0
55	Castanea crenata	0	0	0	0	0	0	0	0	0	0	1	0	0	0	0	0	0	0	0	0
56	Celastrus orbiculatus	1	1	0	0	1	0	1	0	1	1	1	1	1	1	0	1	1	0	1	0
57	Cerasus maximowiczii	0	0	1	0	0	0	0	0	0	0	1	0	0	0	0	0	0	0	0	0
58	Cerasus sargentii	0	0	0	0	0	0	0	0	0	0	0	0	0	0	0	1	0	0	0	0
59	Chamaele decumbens	0	0	0	0	0	0	0	0	0	0	0	0	0	0	0	0	0	0	1	0
60	Chamerion angustifolium	0	0	0	0	1	0	1	0	0	0	0	0	0	0	0	0	0	0	0	0
61	Chengiopanax sciadophylloides	0	0	0	0	0	0	0	0	0	0	0	0	0	0	0	0	0	0	1	0
62	Chimaphila japonica	0	0	0	0	0	0	0	0	0	0	0	0	0	0	0	1	0	0	0	0
63	Chloranthus serratus	0	1	0	0	0	0	0	0	0	0	0	0	0	0	0	0	0	0	0	0
64	Cimicifuga japonica	0	0	0	0	0	0	0	0	0	0	0	0	0	1	0	0	0	0	0	0
65	Cimicifuga simplex	0	1	0	0	0	0	0	0	0	0	0	0	0	1	0	0	0	0	0	0
66	Cirsium japonicum	0	0	0	0	0	0	0	0	1	1	0	1	0	0	0	0	0	0	0	0
67	Cirsium makinoi	0	1	0	0	1	0	0	0	0	0	0	0	0	0	0	0	0	0	0	0
68	Cirsium oligophyllum	1	0	0	0	0	0	0	0	0	0	0	0	1	1	0	0	0	0	0	0
69	Cirsium sp.	1	0	0	1	0	0	0	0	0	1	0	0	1	1	1	0	0	1	0	0
70	Clematis apiifolia	0	0	0	0	0	0	0	0	1	0	0	0	0	0	0	0	0	0	0	0
71	Clinopodium chinense	0	0	0	0	0	0	0	0	0	0	0	1	0	0	0	0	0	0	0	0
72	Clinopodium micranthum	0	0	0	0	0	0	0	0	0	0	0	0	0	0	0	0	0	0	1	0
73	Convallaria majalis	1	0	0	0	1	0	0	0	1	0	0	1	1	1	1	1	0	1	1	0
74	Cornus controversa	0	0	0	0	0	0	0	0	0	0	0	0	0	0	0	0	0	0	1	0
75	Corylus sieboldiana	0	0	0	0	0	0	0	0	0	0	0	0	0	0	0	1	0	0	1	0
76	Cremastra appendiculata	0	1	0	0	0	0	0	0	0	0	0	0	0	0	0	0	1	0	0	0
77	Dactylis glomerata	1	1	0	1	0	0	0	0	1	1	0	0	0	0	1	0	0	0	0	1
78	Deparia petersenii	0	0	0	0	0	0	0	0	0	0	0	0	0	0	0	0	0	0	1	0
79	Deutzia crenata	0	0	0	0	0	0	0	0	0	0	0	0	0	0	0	1	0	0	0	0
80	Dioscorea nipponica	0	1	0	0	1	0	0	0	0	0	0	0	0	0	0	0	0	0	1	0
81	Disporum smilacinum	0	0	0	0	0	0	0	0	0	0	0	0	0	0	0	0	0	0	1	0
82	Dryopteris crassirhizoma	0	1	0	0	1	0	0	0	0	0	0	0	0	0	0	0	0	0	1	0
83	Dryopteris expansa	0	0	0	0	0	1	0	0	0	0	0	0	0	0	0	0	0	0	0	0
84	Epilobium amurense	0	1	0	0	0	0	0	0	0	0	0	0	0	0	0	0	0	0	0	0
85	Erigeron annuus	1	0	0	0	0	0	0	0	0	1	0	0	1	1	0	1	0	0	0	0
86	Erigeron strigosus	1	0	0	0	0	0	0	0	1	0	0	1	0	1	0	0	0	0	0	0
87	Erigeron thunbergii	0	0	0	0	0	0	0	0	0	0	0	0	0	0	0	0	0	1	0	0
88	Euonymus alatus	0	0	0	0	0	0	0	0	0	0	0	0	0	0	0	1	0	0	0	0
89	Euonymus sieboldianus	1	1	0	0	1	0	0	0	0	1	0	1	0	0	0	0	1	1	1	0
90	Eupatorium glehnii	0	0	0	0	1	0	1	0	0	0	0	0	0	1	1	0	0	0	1	0
91	Eupatorium makinoi	0	0	0	0	0	0	0	0	0	0	0	1	0	0	0	0	0	0	1	0
92	Euphrasia maximowiczii	0	0	0	1	0	0	0	0	0	0	0	0	0	0	0	0	0	1	0	0
93	Fallopia japonica	0	0	0	1	1	0	1	0	0	0	0	1	0	0	0	0	0	0	1	1
94	Festuca ovina	1	0	0	0	0	0	0	0	0	0	0	0	0	0	0	0	0	0	0	0
95	Festuca parvigluma	0	0	0	0	0	0	0	0	0	0	0	0	0	0	0	0	0	0	1	0
96	Galium japonicum	0	1	0	0	0	0	0	0	0	0	0	0	0	0	0	0	0	0	1	0
97	Galium kikumugura	0	0	0	0	0	0	0	0	0	0	1	0	0	0	0	0	0	0	0	0
98	Galium trachyspermum	0	0	0	0	0	0	0	0	0	0	0	0	0	1	0	0	0	0	1	0
99	Galium verum	0	0	0	1	1	0	0	0	1	0	0	1	1	1	1	0	0	1	0	0
100	Gentiana scabra	0	0	0	0	0	0	1	0	0	0	0	0	0	0	0	0	1	1	0	0
101	Gentiana triflora	0	0	0	1	0	0	0	0	0	0	0	0	0	0	0	0	0	0	0	0
102	Geranium thunbergii	1	0	0	0	0	0	0	0	1	1	0	0	0	0	0	0	0	1	0	0
103	Geranium yesoense	0	0	0	0	0	0	0	0	0	0	0	0	0	0	0	0	0	1	0	0
104	Geum japonicum	1	1	0	0	0	0	0	0	0	0	0	0	0	0	0	0	1	0	1	0
105	Glechoma hederacea	0	0	0	0	0	1	0	0	0	0	0	0	0	0	0	0	0	0	1	0
106	Halenia corniculata	0	0	0	1	0	0	1	0	0	0	0	0	0	0	0	0	0	1	0	0
107	Hieracium umbellatum	1	0	0	0	0	0	0	0	0	0	0	0	0	0	0	0	0	0	0	0
108	Hosta sieboldiana	0	0	0	0	0	0	0	0	0	0	0	1	1	1	1	0	0	0	0	0
109	Hosta sieboldii	0	0	0	0	0	0	0	0	0	0	0	0	0	0	0	1	0	0	0	0
110	Humulus lupulus	0	1	0	0	0	0	0	0	0	0	0	0	0	0	0	0	0	0	0	0
111	Huperzia serrata	0	0	0	0	0	0	0	0	0	0	0	0	0	0	0	0	0	0	1	0
112	Hydrangea paniculata	0	0	0	0	1	1	1	0	0	0	0	0	0	0	0	0	0	0	0	0
113	Hydrocotyle ramiflora	0	0	0	1	0	0	0	0	0	0	0	0	0	0	0	0	0	0	0	0
114	Hypericum erectum	1	1	0	1	0	0	0	0	0	0	0	0	0	0	1	0	0	0	0	0
115	Hypochaeris radicata	0	0	0	0	0	0	0	0	1	0	0	0	0	0	0	0	0	0	0	0
116	Impatiens noli-tangere	0	1	0	0	0	0	0	0	0	0	0	0	0	0	0	0	0	0	0	0
117	Inula salicina	0	0	0	0	0	0	0	0	0	0	0	1	0	0	0	0	0	0	0	0
118	Iris sanguinea	0	1	0	0	0	0	1	0	1	1	0	1	1	1	1	0	0	1	0	0
119	Isodon umbrosus	0	0	0	0	1	0	0	0	0	0	0	0	0	0	0	0	0	0	1	0
120	Ixeridium dentatum	0	0	0	1	0	0	0	0	1	0	0	1	1	1	1	1	0	0	0	0
121	Kalopanax septemlobus	0	0	0	0	0	0	0	0	0	0	0	0	0	0	0	0	0	0	1	0
122	Lactuca indica	0	0	0	0	0	0	0	0	0	0	0	0	0	0	0	0	0	0	0	1
123	Laportea bulbifera	0	1	0	0	1	0	0	0	0	0	0	0	0	0	0	0	0	0	0	0
124	Larix kaempferi	0	0	0	1	0	1	1	1	0	0	1	0	0	0	0	0	0	0	0	0
125	Lespedeza bicolor	1	0	0	1	0	0	1	0	1	0	0	1	1	1	1	1	0	1	0	0
126	Leucanthemum vulgare	0	0	0	0	0	0	0	0	1	0	0	0	0	0	0	0	0	0	0	0
127	Libanotis ugoensis	1	0	0	0	0	0	0	0	0	0	0	0	0	0	0	0	0	1	0	0
128	Ligularia dentata	0	0	0	1	1	0	0	0	0	0	0	0	0	1	1	1	0	0	0	0
129	Ligustrum tschonoskii	0	1	0	0	0	0	0	0	0	0	0	0	0	0	0	0	0	0	1	0
130	Lilium leichtlinii	0	0	0	0	0	0	0	0	0	0	0	1	0	0	0	0	0	1	0	0
131	Lindera obtusiloba	0	0	0	0	0	0	0	0	0	0	0	0	0	0	0	0	0	0	1	0
132	Lindera praecox	0	0	0	0	0	0	0	0	0	0	0	0	0	0	0	0	0	0	1	0
133	Liparis kumokiri	0	0	0	0	0	0	0	0	0	0	0	0	0	0	0	1	0	0	0	0
134	Liriope muscari	0	0	0	0	0	0	0	0	0	0	0	0	0	0	0	0	0	0	1	0
135	Lotus corniculatus	0	0	0	1	0	0	0	0	1	1	0	0	0	0	0	0	0	0	0	0
136	Luzula multiflora	0	0	0	0	0	0	0	0	0	0	0	0	0	0	1	0	0	0	0	0
137	Lycopodium clavatum	0	0	0	1	0	0	1	0	0	0	0	0	0	0	0	0	0	0	0	0
138	Lycopodium complanatum	0	0	0	0	0	0	1	0	0	0	0	0	0	0	0	0	0	0	0	0
139	Lysimachia clethroides	0	1	0	1	0	0	0	0	1	0	0	1	1	1	1	1	0	1	0	0
140	Lysimachia japonica	0	0	0	1	0	0	0	0	1	1	0	0	0	1	0	0	0	0	0	0
141	Maackia amurensis	0	0	1	0	0	0	0	1	0	0	0	0	0	0	0	0	1	0	0	0
142	Malus toringo	1	0	0	0	0	0	1	0	0	0	0	1	0	0	1	0	1	0	0	0
143	Mentha canadensis	1	0	0	0	0	0	0	0	0	0	0	0	0	0	0	0	0	0	0	0
144	Miscanthus sinensis	1	0	0	1	1	0	1	0	1	1	0	1	1	1	1	1	0	1	0	0
145	Oenothera biennis	1	0	0	1	0	0	0	0	1	1	0	1	0	1	0	0	0	0	0	0
146	Ophioglossum vulgatum	0	0	0	0	0	0	0	0	0	0	0	0	0	1	0	0	0	0	0	0
147	Padus grayana	0	0	0	0	0	0	0	0	0	0	0	0	0	0	0	0	0	0	1	0
148	Paeonia obovata	0	1	0	0	1	0	0	0	0	0	0	0	0	0	0	0	0	0	0	0
149	Parnassia palustris	0	0	0	1	0	0	0	0	0	0	0	0	0	0	0	0	0	1	0	0
150	Paspalum thunbergii	0	0	0	0	0	0	0	0	0	0	0	1	0	0	0	0	0	0	0	0
151	Patrinia scabiosifolia	0	0	0	0	0	0	0	0	1	0	0	1	1	1	0	0	0	1	0	0
152	Patrinia villosa	0	0	0	0	0	0	0	0	1	0	0	0	0	0	0	0	0	0	0	0
153	Persicaria longiseta	1	1	0	0	0	0	0	0	0	0	0	0	0	0	0	0	0	0	0	0
154	Persicaria sagittata	1	0	0	0	0	0	0	0	0	0	0	0	0	0	0	0	0	0	0	0
155	Petasites japonicus	0	1	0	1	0	0	0	0	0	0	0	0	0	1	0	0	0	0	0	0
156	Phedimus aizoon	0	0	0	0	0	0	1	0	0	0	0	0	0	1	0	0	0	0	0	0
157	Phellodendron amurense	0	0	0	0	0	0	0	0	0	1	0	0	0	0	0	0	0	0	0	0
158	Philadelphus satsumi	0	1	0	0	1	0	0	0	0	0	0	0	0	0	0	0	0	0	0	0
159	Phleum pratense	0	0	0	0	0	0	0	0	1	0	0	0	0	0	0	0	0	0	0	1
160	Picris hieracioides	1	1	0	0	0	0	0	0	0	1	1	1	0	0	1	0	0	0	0	0
161	Pinus densiflora	0	0	1	0	0	0	0	0	0	0	0	0	0	0	0	1	1	0	0	0
162	Plantago asiatica	1	0	0	0	0	0	0	0	0	1	0	0	0	0	0	0	0	1	0	0
163	Plantago lanceolata	0	0	0	0	0	0	0	0	1	0	0	0	0	0	0	0	0	1	0	0
164	Poa compressa	0	0	0	0	0	0	0	0	0	1	0	0	0	0	0	0	0	0	0	1
165	Poa pratensis	1	0	0	0	0	0	0	0	0	0	0	1	0	0	0	0	0	0	0	0
166	Polygala japonica	0	0	0	0	0	0	0	0	0	0	0	0	0	0	0	0	0	1	0	0
167	Polygonatum lasianthum	0	0	0	0	0	0	0	0	0	0	0	0	0	0	0	0	0	0	1	0
168	Polygonatum odoratum	1	0	0	1	0	0	0	0	0	0	0	1	1	1	1	1	0	0	0	0
169	Polystichum braunii	0	0	0	0	0	1	0	0	0	0	0	0	0	0	0	0	0	0	0	0
170	Polystichum polyblepharon	0	0	0	0	0	0	0	0	0	0	0	0	0	0	0	0	0	0	1	0
171	Populus tremula	0	0	0	1	0	0	0	0	0	0	0	0	0	0	0	0	0	0	0	0
172	Potentilla fragarioides	0	0	0	0	0	0	1	0	1	0	0	0	0	0	0	0	0	0	0	0
173	Potentilla freyniana	1	0	0	1	0	0	1	0	1	1	0	1	1	1	1	0	0	1	1	1
174	Prunella vulgaris	1	0	0	1	0	0	0	0	1	0	0	1	0	0	1	0	0	1	0	0
175	Pteridium aquilinum	1	1	1	1	1	0	0	0	1	0	0	1	1	1	1	0	0	1	0	0
176	Pyrola asarifolia	0	0	1	0	0	0	0	0	0	0	0	0	0	0	0	1	0	0	0	0
177	Quercus crispula	0	0	0	0	0	0	0	0	0	0	0	0	0	0	0	1	0	0	1	0
178	Rhododendron molle	0	0	0	0	0	0	0	0	0	0	0	0	0	0	1	0	0	0	0	0
179	Rodgersia podophylla	0	1	0	0	1	0	0	0	0	0	0	0	0	0	0	0	0	0	0	0
180	Rosa amblyotis	0	1	0	0	0	0	0	0	0	0	0	0	0	0	0	0	0	0	0	0
181	Rosa multiflora	1	1	0	0	1	0	0	0	0	0	1	0	0	1	0	1	1	0	1	0
182	Rubus crataegifolius	0	0	0	0	0	0	0	0	0	0	0	0	0	0	0	0	0	0	1	0
183	Rubus parvifolius	1	0	0	0	0	0	0	0	0	0	0	1	1	0	0	0	0	0	0	0
184	Rubus pungens	0	0	0	0	1	0	0	0	0	0	0	0	0	0	0	0	0	0	0	0
185	Rubus subcrataegifolius	1	1	0	1	1	0	1	0	1	0	0	1	1	1	1	1	0	1	1	0
186	Rumex acetosa	0	0	0	0	0	0	0	0	0	0	0	0	0	0	0	0	0	0	1	0
187	Rumex acetosella	0	0	0	0	0	0	0	0	0	0	0	0	0	0	1	0	0	0	0	0
188	Rumex obtusifolius	0	0	0	0	0	0	0	0	0	0	0	0	0	0	0	0	0	0	0	1
189	Salix caprea	0	0	0	1	0	0	1	0	0	0	0	0	0	0	0	0	0	1	0	0
190	Salix chaenomeloides	0	0	0	1	0	0	0	0	0	0	0	0	0	0	0	0	0	0	0	0
191	Salix integra	0	0	0	0	0	0	1	0	0	0	0	0	0	0	0	0	0	0	0	0
192	Sambucus racemosa	0	0	0	0	1	1	0	0	0	0	1	0	0	0	0	0	0	0	1	0
193	Sanguisorba officinalis	1	0	0	1	0	0	0	0	0	0	0	1	1	1	1	0	0	1	0	0
194	Sanicula rubriflora	0	0	0	0	0	0	0	0	0	0	0	0	0	0	0	0	0	0	1	0
195	Sasa senanensis	0	0	1	0	1	1	0	1	1	1	1	0	1	0	0	0	1	0	0	0
196	Scabiosa japonica	0	0	0	1	0	0	1	0	0	0	0	0	0	0	0	0	0	0	0	0
197	Schedonorus phoenix	0	0	0	0	0	0	0	0	0	1	0	0	0	0	0	0	0	0	0	0
198	Schisandra chinensis	0	1	0	0	1	0	0	0	0	0	0	0	0	0	0	0	0	0	1	0
199	Senecio cannabifolius	0	1	0	0	0	0	0	0	1	1	0	0	0	1	0	0	0	0	0	0
200	Senecio nemorensis	0	0	0	0	1	0	0	0	0	0	0	0	0	1	0	0	0	0	1	0
201	Serratula coronata	0	0	0	0	1	0	0	0	0	0	0	0	0	1	1	0	0	0	0	0
202	Silene baccifera	0	1	0	0	1	0	0	0	0	0	0	0	0	0	0	0	0	0	0	0
203	Solidago virgaurea	1	0	0	1	0	0	1	0	0	1	0	1	0	1	1	1	0	1	1	1
204	Sorbus commixta	0	0	0	0	0	0	0	0	0	0	0	0	0	0	0	0	0	0	1	0
205	Spodiopogon sibiricus	1	0	0	0	1	0	0	0	1	0	0	1	1	0	0	0	0	0	1	0
206	Synurus excelsus	0	0	0	0	0	0	0	0	1	0	0	1	1	0	0	0	0	0	0	0
207	Synurus pungens	0	0	0	0	0	0	0	0	0	0	0	1	0	0	0	0	0	0	0	0
208	Thalictrum aquilegiifolium	1	1	0	0	1	0	0	0	0	0	0	0	1	1	0	0	0	0	0	0
209	Thalictrum minus	1	0	0	0	1	0	0	0	1	0	0	1	1	1	1	0	0	0	0	0
210	Thelypteris phegopteris	0	0	0	0	0	0	1	0	0	0	0	0	0	0	0	0	0	0	0	0
211	Thymus quinquecostatus	0	0	0	0	0	0	0	0	0	0	0	0	0	0	0	0	0	1	0	0
212	Tilia maximowicziana	0	0	0	0	0	0	0	0	0	0	1	0	0	0	0	0	0	0	0	0
213	Toxicodendron orientale	0	0	0	0	0	0	0	0	0	0	1	0	0	0	0	1	1	0	1	0
214	Toxicodendron trichocarpum	0	0	0	0	0	0	0	1	0	0	1	0	0	0	0	1	0	0	0	0
215	Trifolium pratense	0	0	0	0	0	0	0	0	0	1	0	0	0	0	0	0	0	0	0	1
216	Trillium apetalon	0	1	0	0	0	0	0	0	0	0	0	0	0	0	0	0	0	0	1	0
217	Triosteum sinuatum	0	0	0	0	0	0	0	0	0	0	0	0	1	0	0	0	0	0	0	0
218	Turritis glabra	1	0	0	0	0	0	0	0	0	0	0	0	0	0	0	0	0	0	0	0
219	Ulmus parvifolia	0	0	0	0	0	0	0	0	0	0	1	0	0	0	0	0	0	0	0	0
220	Unidentified_1	0	0	0	0	0	0	0	0	0	0	0	0	0	0	0	0	1	0	0	0
221	Unidentified_2	0	0	0	0	0	0	0	0	0	0	0	0	0	0	0	0	0	0	1	0
222	Unidentified_3	0	0	0	0	0	0	0	0	0	0	0	0	0	1	0	0	0	0	0	0
223	Unidentified_4	0	0	0	0	0	0	0	0	0	0	0	0	0	1	0	0	0	0	0	0
224	Unidentified_5	0	0	0	0	0	0	0	0	0	0	0	0	0	0	0	1	0	0	0	0
225	Unidentified_6	0	0	0	0	0	0	0	0	0	1	0	0	0	0	0	0	0	0	0	0
226	Unidentified_7	0	0	0	0	0	0	0	0	0	0	0	0	0	0	0	0	1	0	0	0
227	Unidentified_8	0	0	0	0	0	1	0	0	0	0	0	0	0	0	0	0	0	0	0	0
228	Unidentified_Cyperaceae 1	0	0	0	0	0	0	0	0	0	0	0	0	0	0	0	0	0	0	0	1
229	Unidentified_Cyperaceae 2	1	0	0	0	0	0	0	0	0	0	0	0	0	0	0	0	0	0	0	0
230	Unidentified_Cyperaceae 3	0	1	0	0	0	0	0	0	0	0	0	0	0	0	0	0	0	0	0	0
231	Unidentified_pteridophytes 1	0	1	0	0	0	0	0	0	0	0	0	0	0	0	0	0	0	0	0	0
232	Unidentified_pteridophytes 2	0	0	0	0	0	0	0	0	0	0	0	0	0	0	0	1	0	0	0	0
233	Unidentified_Rosaceae	0	0	0	0	0	0	0	0	0	0	0	0	0	0	0	0	0	0	1	0
234	Veronica onoei	0	0	0	1	0	0	0	0	0	0	0	0	0	0	0	0	0	1	0	0
235	Veronicastrum japonicum	0	0	0	0	0	0	1	0	0	0	0	0	0	1	0	0	0	0	0	0
236	Viburnum furcatum	0	0	0	0	0	0	0	0	0	0	0	0	0	0	0	0	0	0	1	0
237	Viburnum opulus	0	0	0	0	0	0	0	0	0	0	0	1	0	0	0	0	0	0	0	0
238	Viburnum wrightii	0	0	0	0	0	0	0	0	0	0	0	0	0	0	0	0	0	0	1	0
239	Vincetoxicum atratum	0	0	0	0	0	0	0	0	0	0	0	1	1	0	0	0	0	0	0	0
240	Vincetoxicum pycnostelma	0	0	0	0	0	0	0	0	0	0	0	0	0	0	0	0	0	1	0	0
241	Viola grypoceras	0	1	0	1	1	0	1	0	1	0	0	1	0	1	1	1	0	0	1	0
242	Viola mandshurica	0	0	0	0	0	0	0	0	1	1	0	0	0	0	0	0	0	1	0	0
243	Viola phalacrocarpa	0	1	0	0	0	0	0	0	0	0	0	0	1	0	0	0	0	1	0	0
244	Vitis coignetiae	0	0	0	0	1	0	0	0	0	0	0	0	1	0	0	0	0	0	1	0
245	Zoysia japonica	0	0	0	1	0	0	0	0	0	0	0	0	0	0	0	0	0	0	0	0
